# Supplementary material for: AAV induces hepatic necroptosis and carcinoma in diabetic and obese mice dependent on Pebp1 pathway
Source: PubMed Central journal article supplement (PMC10331584; doi:10.15252/emmm.202217230), 2023-06-05
Supplement: EMMM-15-e17230-s009.pdf [file EMMM-15-e17230-s009.pdf]

## Expanded View Figures

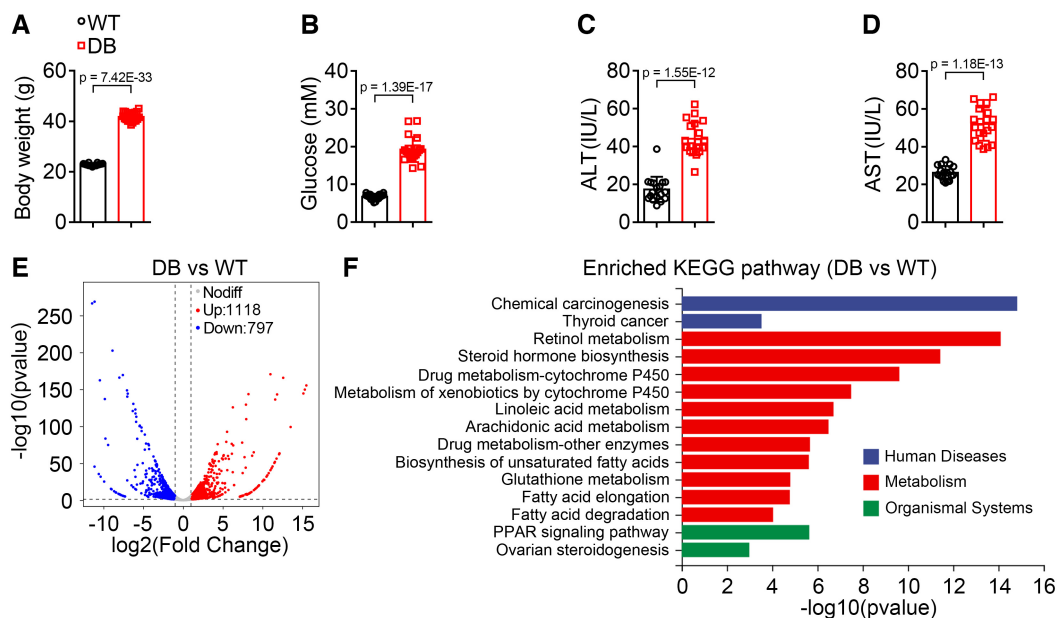

**Figure EV1. Body weight, blood glucose levels, and serum ALT and AST activities, hepatic transcriptomic analysis of wild type and *db/db* mice.**

A, B Body weight (A) and blood glucose levels (B) were significantly increased in *db/db* mice.  $n = 18-20$  for each group.  
 C, D Serum alanine aminotransferase (ALT) (C) and aspartate aminotransferase (AST) (D) activities were significantly elevated in *db/db* mice.  $n = 18-20$  for each group.  
 E Scatter plot comparing the differentially expressed genes detected by RNA-seq in liver of wild-type and *db/db* mice.  
 F The top 15 significantly enriched KEGG pathways of the differentially expressed genes in (E).

Data information: In (A–D), data are presented as mean  $\pm$  SD. Student's *t*-test.

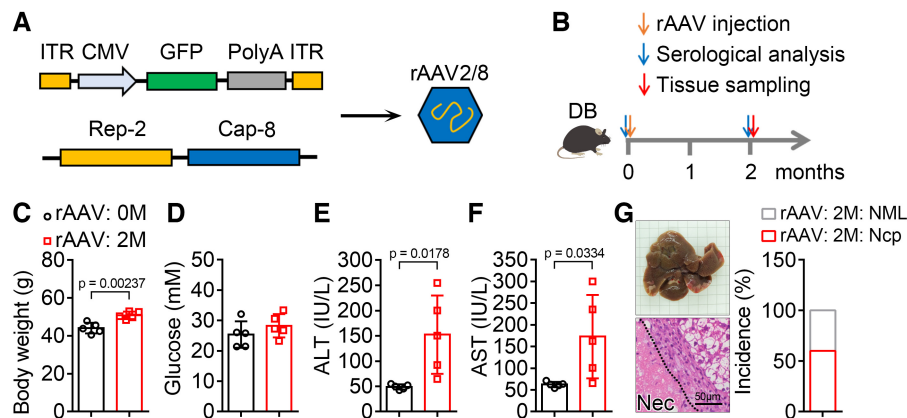

**Figure EV2. Injection of rAAV serotype 2/8 can also lead to liver injury and necroptosis in *db/db* mice.**

A, B Schematic of rAAV serotype 2/8 (rAAV2/8) package (A) and the experimental design for the effect of rAAV2/8 injection on liver function and hepatic necroptosis (B). ITR, AAV2 ITR.  
 C–F Two months after a single injection of rAAV2/8, *db/db* mice showed similar blood glucose levels (D), and increased body weight (C), serum ALT (E) and AST (F) activities compared with those before injection of rAAV2/8.  $n = 5$ .  
 G Liver images, H&E staining of liver sections and the incidence of hepatic necroptosis (Ncp) for mice in (C). NML, Normal.

Data information: In (C–F), data are presented as mean  $\pm$  SD. Student's *t*-test.

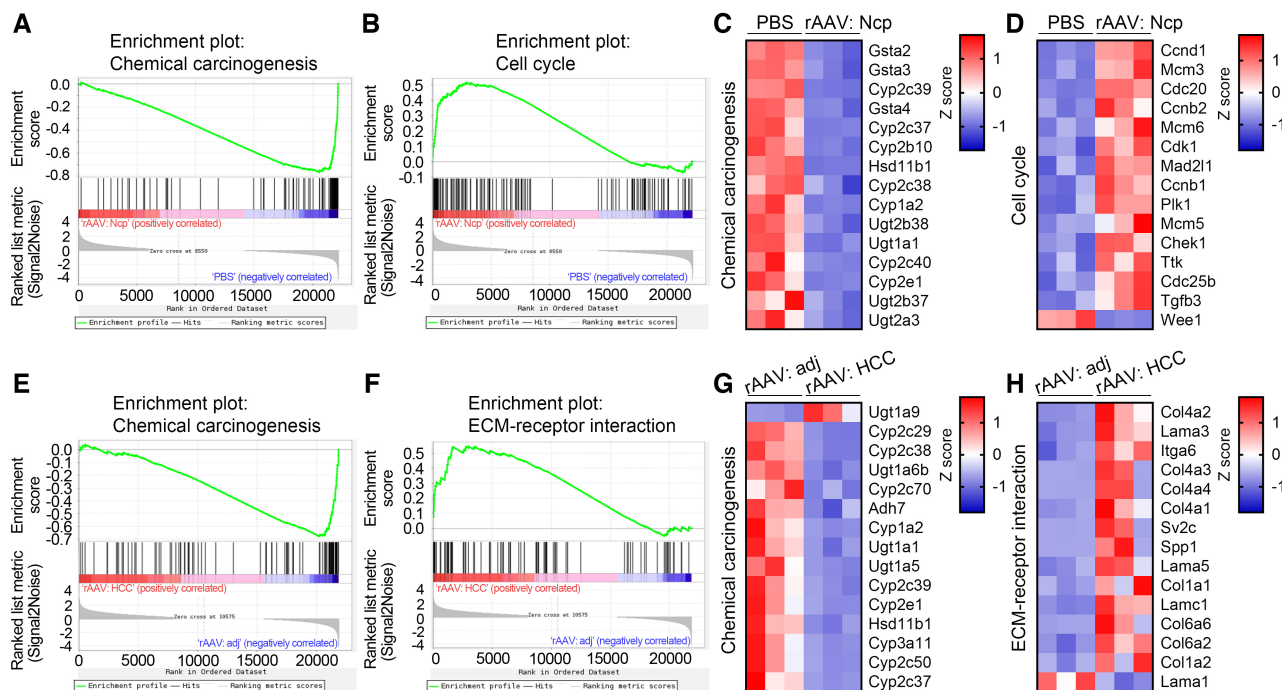

**Figure EV3. GSEA analysis and heatmaps of the top 15 differentially expressed genes in the indicated enriched KEGG pathways.**

- A, B GSEA analysis of the indicated enriched KEGG pathways of the differentially expressed genes in normal or necroptotic area from the liver of mice after a single injection of PBS or rAAV for 2 months. Ncp, necroptosis.
- C, D Heatmaps of the top 15 differentially expressed genes ranked by adjusted *P* value in the indicated KEGG pathways in (A) and (B).
- E, F GSEA analysis of the indicated enriched KEGG pathways of the differentially expressed genes in adjacent or HCC area from the liver of mice after a single injection of rAAV for 6 months. adj, adjacent.
- G, H Heatmaps of the top 15 differentially expressed genes ranked by adjusted *P* value in the indicated KEGG pathways in (E) and (F).

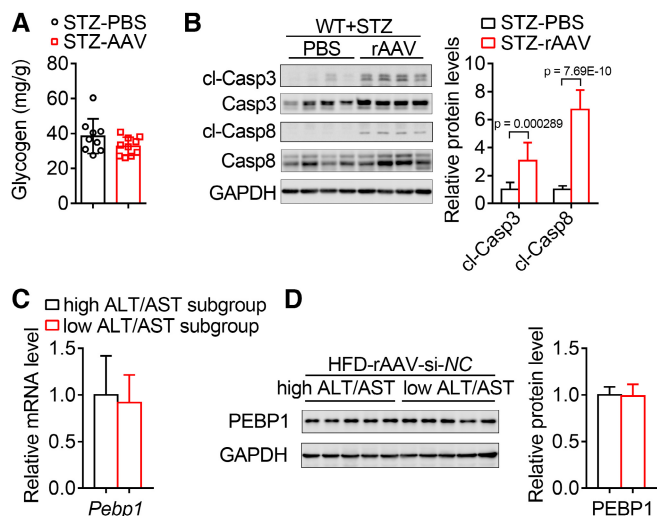

**Figure EV4. Effect of rAAV injection on hepatic glycogen content and apoptosis in hyperglycemic mice and on endogenous *Pebp1* level in liver of hyperglycemic and obese mice.**

- A Two months after a single injection of rAAV, hyperglycemic mice induced by streptozotocin showed similar glycogen content compared with those mice injected with PBS.  $n = 9-10$ .
- B The hepatic protein levels of cleaved Caspase 3 (cl-Casp3) and cleaved Caspase 8 (cl-Casp8) in the livers of mice in (A) were measured to monitor apoptosis.  $n = 9-10$ .
- C The hepatic mRNA level of *Pebp1* were similar in the high ALT & AST subgroup and low ALT & AST subgroup from HFD-induced hyperglycemic and obese mice injected with rAAV-si-NC as shown in Fig 6D and E.  $n = 5$  biological replicates.
- D The hepatic protein level of *Pebp1* from mice in (C).

Data information: In (A–D), data are presented as mean  $\pm$  SD. Student's *t*-test.

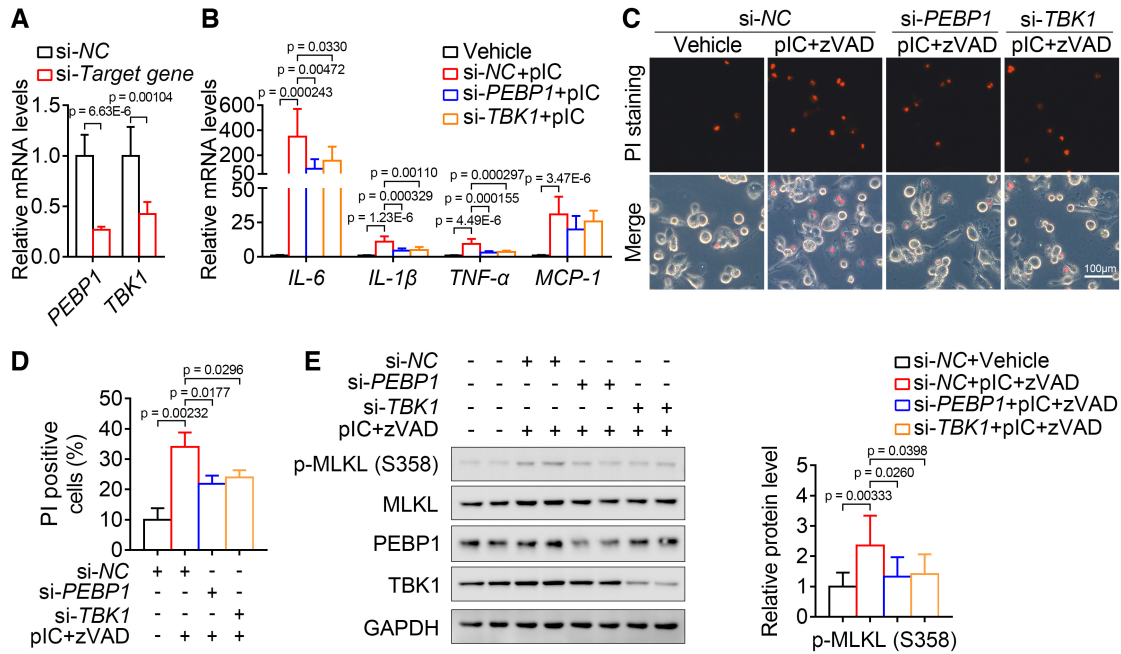

**Figure EV5. Suppression of PEBP1 signaling alleviates inflammation and necroptosis in human macrophages.**

A The effect of si-*PEBP1* and si-*TBK1* in THP-1 human macrophages.  $n = 6$  biological replicates.  
 B Knockdown of *PEBP1* and *TBK1* markedly blocked the increase of some key inflammatory factors in THP-1 macrophages treated with poly(I:C).  $n = 9$  biological replicates.  
 C–E Knockdown of *PEBP1* and *TBK1* markedly blocked the loss of cell membrane integrity (C–D,  $n = 3$  in triplicate) and the increase of p-MLKL level (E,  $n = 8$  biological replicates) of THP-1 macrophages induced by poly(I:C) and z-VAD-fmk.

Data information: In (A, B, D, E), data are presented as mean  $\pm$  SD. Student's *t*-test.
